# Supplementary material
Source: publisher site journal article supplement (https://www.dovepress.com/article/413924)
Supplement: Supplementary file 1 [file get_supplementary_file.php]

|  | | | | | | | | |
| --- | --- | --- | --- | --- | --- | --- | --- | --- |
| **GeneName** | **Accession** | **Description** | **MEAN A** | **MEAN B** | **P-VALUE** | **Q-VALUE** | **FOLD CHANGE** | **LOG_FOLDCHANGE** | |
| ST6GAL1 | P15907 | Beta-galactoside alpha-2,6-sialyltransferase 1 OS=Homo sapiens OX=9606 GN=ST6GAL1 PE=1 SV=1 | 3.8911E-05 | 0.001572405 | 0.028459737 |  | 0.024746203 | -5.336649001 | |
| PSMA1 | P25786 | Proteasome subunit alpha type-1 OS=Homo sapiens OX=9606 GN=PSMA1 PE=1 SV=1 | 2.81507E-05 | 0.000938041 | 0.028459737 |  | 0.030010092 | -5.058408439 | |
| GAS6 | Q14393 | Growth arrest-specific protein 6 OS=Homo sapiens OX=9606 GN=GAS6 PE=1 SV=3 | 2.81507E-05 | 0.000936967 | 0.028459737 |  | 0.030044501 | -5.05675522 | |
| CST6 | Q15828 | Cystatin-M OS=Homo sapiens OX=9606 GN=CST6 PE=1 SV=1 | 2.81507E-05 | 0.000926169 | 0.028459737 |  | 0.030394775 | -5.040032851 | |
| ITM2B | Q9Y287 | Integral membrane protein 2B OS=Homo sapiens OX=9606 GN=ITM2B PE=1 SV=1 | 2.81507E-05 | 0.000914293 | 0.028459737 |  | 0.030789579 | -5.021414068 | |
| FCRL5 | Q96RD9 | Fc receptor-like protein 5 OS=Homo sapiens OX=9606 GN=FCRL5 PE=1 SV=3 | 0.0002425 | 0.001308917 | 0.003557818 | 0.456512489 | 0.185268003 | -2.432314355 | |
| SERPINB3 | P29508 | Serpin B3 OS=Homo sapiens OX=9606 GN=SERPINB3 PE=1 SV=2 | 0.000253622 | 0.001318241 | 0.028459737 |  | 0.192394299 | -2.377862045 | |
| PSMA3 | P25788 | Proteasome subunit alpha type-3 OS=Homo sapiens OX=9606 GN=PSMA3 PE=1 SV=2 | 0.000306654 | 0.00126919 | 0.020186306 | 0.513334043 | 0.24161397 | -2.049224224 | |
| CSF1 | P09603 | Macrophage colony-stimulating factor 1 OS=Homo sapiens OX=9606 GN=CSF1 PE=1 SV=2 | 0.000309238 | 0.00122628 | 0.028459737 |  | 0.252175358 | -1.987500789 | |
| HLA-A | P05534 | HLA class I histocompatibility antigen, A-24 alpha chain OS=Homo sapiens OX=9606 GN=HLA-A PE=1 SV=2 | 0.000737201 | 0.001732391 | 0.006397797 | 0.471467732 | 0.425539458 | -1.232635182 | |
| IGHG4 | P01861 | Immunoglobulin heavy constant gamma 4 OS=Homo sapiens OX=9606 GN=IGHG4 PE=1 SV=1 | 0.000830051 | 0.001674311 | 0.031075251 | 0.538666721 | 0.495756763 | -1.012295641 | |
| IGHV3-9 | P01782 | Immunoglobulin heavy variable 3-9 OS=Homo sapiens OX=9606 GN=IGHV3-9 PE=1 SV=2 | 0.00092161 | 0.001576005 | 0.022239804 | 0.519766347 | 0.584775908 | -0.77404422 | |
| IGLV3-21 | P80748 | Immunoglobulin lambda variable 3-21 OS=Homo sapiens OX=9606 GN=IGLV3-21 PE=1 SV=2 | 0.000920374 | 0.001571427 | 0.006089215 | 0.470489214 | 0.585693038 | -0.771783349 | |
| IGKV1-17 | P01599 | Immunoglobulin kappa variable 1-17 OS=Homo sapiens OX=9606 GN=IGKV1-17 PE=1 SV=2 | 0.00092643 | 0.001559094 | 0.027284347 | 0.531902374 | 0.594210531 | -0.750953921 | |
| CES1 | P23141 | Liver carboxylesterase 1 OS=Homo sapiens OX=9606 GN=CES1 PE=1 SV=2 | 0.000932718 | 0.00154456 | 0.004884332 | 0.465547476 | 0.60387262 | -0.727683833 | |
| IGHG2 | P01859 | Immunoglobulin heavy constant gamma 2 OS=Homo sapiens OX=9606 GN=IGHG2 PE=1 SV=2 | 0.000967522 | 0.001520008 | 0.009566956 | 0.482426934 | 0.636524016 | -0.651713146 | |
| IGHV3-7 | P01780 | Immunoglobulin heavy variable 3-7 OS=Homo sapiens OX=9606 GN=IGHV3-7 PE=1 SV=2 | 0.000995356 | 0.001494114 | 0.013084742 | 0.48859094 | 0.666185131 | -0.58600494 | |
| WHAMM | Q8TF30 | WASP homolog-associated protein with actin, membranes and microtubules OS=Homo sapiens OX=9606 GN=WHAMM PE=1 SV=2 | 0.000997598 | 0.001494641 | 0.036583747 | 0.546194323 | 0.667449823 | -0.583268712 | |
| IGKV3-20 | P01619 | Immunoglobulin kappa variable 3-20 OS=Homo sapiens OX=9606 GN=IGKV3-20 PE=1 SV=2 | 0.000994199 | 0.001489068 | 0.013838037 | 0.489516905 | 0.667664988 | -0.582803707 | |
| IGKV3D-11 | A0A0A0MRZ8 | Immunoglobulin kappa variable 3D-11 OS=Homo sapiens OX=9606 GN=IGKV3D-11 PE=3 SV=6 | 0.00101232 | 0.001484259 | 0.039369205 | 0.549257941 | 0.68203753 | -0.552076967 | |
|  | P0DOX7 | Immunoglobulin kappa light chain OS=Homo sapiens OX=9606 PE=1 SV=1 | 0.001011303 | 0.001480428 | 0.024772306 | 0.526407475 | 0.68311529 | -0.54979901 | |
| IGKV1D-33 | P01593 | Immunoglobulin kappa variable 1D-33 OS=Homo sapiens OX=9606 GN=IGKV1D-33 PE=1 SV=2 | 0.001012031 | 0.001477102 | 0.040572046 | 0.550460166 | 0.685146329 | -0.545515953 | |
| IGKV3-15 | P01624 | Immunoglobulin kappa variable 3-15 OS=Homo sapiens OX=9606 GN=IGKV3-15 PE=1 SV=2 | 0.001013284 | 0.00147267 | 0.020276085 | 0.513627598 | 0.688059113 | -0.539395579 | |
| PHKA1 | P46020 | Phosphorylase b kinase regulatory subunit alpha, skeletal muscle isoform OS=Homo sapiens OX=9606 GN=PHKA1 PE=1 SV=2 | 0.001014223 | 0.001460517 | 0.047160333 | 0.556024947 | 0.694427579 | -0.526103849 | |
| IGLV1-47 | P01700 | Immunoglobulin lambda variable 1-47 OS=Homo sapiens OX=9606 GN=IGLV1-47 PE=1 SV=2 | 0.001018146 | 0.001461194 | 0.03982888 | 0.549725328 | 0.696790121 | -0.521203925 | |
|  | P0DOX5 | Immunoglobulin gamma-1 heavy chain OS=Homo sapiens OX=9606 PE=1 SV=2 | 0.001019549 | 0.00145932 | 0.014515516 | 0.49027017 | 0.698646836 | -0.517364733 | |
| IGKC | P01834 | Immunoglobulin kappa constant OS=Homo sapiens OX=9606 GN=IGKC PE=1 SV=2 | 0.001038144 | 0.001454437 | 0.035627778 | 0.545041393 | 0.713777347 | -0.486453979 | |
| IGHV3-30 | P01768 | Immunoglobulin heavy variable 3-30 OS=Homo sapiens OX=9606 GN=IGHV3-30 PE=1 SV=2 | 0.001040179 | 0.001443988 | 0.00712925 | 0.474808439 | 0.720351745 | -0.473226553 | |
|  | P0DOX8 | Immunoglobulin lambda-1 light chain OS=Homo sapiens OX=9606 PE=1 SV=1 | 0.001067675 | 0.001409592 | 0.046870892 | 0.555811268 | 0.757435687 | -0.400804698 | |
| FGG | P02679 | Fibrinogen gamma chain OS=Homo sapiens OX=9606 GN=FGG PE=1 SV=3 | 0.001065663 | 0.001405959 | 0.040927423 | 0.550802799 | 0.757962057 | -0.399802465 | |
| FAP | Q12884 | Prolyl endopeptidase FAP OS=Homo sapiens OX=9606 GN=FAP PE=1 SV=5 | 0.00108246 | 0.001400932 | 0.009814713 | 0.482999082 | 0.772671113 | -0.372073633 | |
| CNTFR | P26992 | Ciliary neurotrophic factor receptor subunit alpha OS=Homo sapiens OX=9606 GN=CNTFR PE=1 SV=2 | 0.001086655 | 0.00139579 | 0.014018235 | 0.489724137 | 0.778523546 | -0.361187422 | |
| IGHV1-46 | P01743 | Immunoglobulin heavy variable 1-46 OS=Homo sapiens OX=9606 GN=IGHV1-46 PE=1 SV=2 | 0.001087939 | 0.00139421 | 0.026759206 | 0.530830026 | 0.780326401 | -0.357850384 | |
| INHBC | P55103 | Inhibin beta C chain OS=Homo sapiens OX=9606 GN=INHBC PE=2 SV=1 | 0.001107921 | 0.001379105 | 0.034494665 | 0.543598947 | 0.803362108 | -0.31587768 | |
| MMRN2 | Q9H8L6 | Multimerin-2 OS=Homo sapiens OX=9606 GN=MMRN2 PE=1 SV=2 | 0.00111874 | 0.001359508 | 0.016222984 | 0.497641399 | 0.822900632 | -0.281209864 | |
| PSAP | P07602 | Prosaposin OS=Homo sapiens OX=9606 GN=PSAP PE=1 SV=2 | 0.001351871 | 0.0011218 | 0.012555063 | 0.487875722 | 1.205090542 | 0.269141545 | |
| ADAMDEC1 | O15204 | ADAM DEC1 OS=Homo sapiens OX=9606 GN=ADAMDEC1 PE=1 SV=2 | 0.00135698 | 0.001115911 | 0.019012398 | 0.509275212 | 1.216028116 | 0.282176586 | |
| YWHAE | P62258 | 14-3-3 protein epsilon OS=Homo sapiens OX=9606 GN=YWHAE PE=1 SV=1 | 0.00138412 | 0.001097847 | 0.024075767 | 0.52470416 | 1.260758889 | 0.334292397 | |
| FBLN5 | Q9UBX5 | Fibulin-5 OS=Homo sapiens OX=9606 GN=FBLN5 PE=1 SV=1 | 0.001378666 | 0.001086109 | 0.035498327 | 0.544880885 | 1.269361788 | 0.344103318 | |
| SELENBP1 | Q13228 | Methanethiol oxidase OS=Homo sapiens OX=9606 GN=SELENBP1 PE=1 SV=2 | 0.001404628 | 0.001077351 | 0.007777609 | 0.477274294 | 1.303779217 | 0.382699583 | |
| F13A1 | P00488 | Coagulation factor XIII A chain OS=Homo sapiens OX=9606 GN=F13A1 PE=1 SV=4 | 0.001405297 | 0.00105761 | 0.042730129 | 0.552459071 | 1.328748093 | 0.410067621 | |
| PIP4K2C | Q8TBX8 | Phosphatidylinositol 5-phosphate 4-kinase type-2 gamma OS=Homo sapiens OX=9606 GN=PIP4K2C PE=1 SV=3 | 0.001419592 | 0.001056053 | 0.034246476 | 0.543271328 | 1.344243773 | 0.426794788 | |
| LTA4H | P09960 | Leukotriene A-4 hydrolase OS=Homo sapiens OX=9606 GN=LTA4H PE=1 SV=2 | 0.001453119 | 0.001026083 | 0.006181304 | 0.470791023 | 1.416181771 | 0.502006451 | |
| CUL1 | Q13616 | Cullin-1 OS=Homo sapiens OX=9606 GN=CUL1 PE=1 SV=2 | 0.001464933 | 0.001013554 | 0.004604229 | 0.464048925 | 1.445342216 | 0.531411122 | |
| S100A6 | P06703 | Protein S100-A6 OS=Homo sapiens OX=9606 GN=S100A6 PE=1 SV=1 | 0.001519 | 0.000959318 | 0.015186242 | 0.492407337 | 1.583416482 | 0.663040774 | |
| RSU1 | Q15404 | Ras suppressor protein 1 OS=Homo sapiens OX=9606 GN=RSU1 PE=1 SV=3 | 0.001519428 | 0.000954133 | 0.002674582 | 0.445988006 | 1.592468807 | 0.671265113 | |
| SFTPB | P07988 | Pulmonary surfactant-associated protein B OS=Homo sapiens OX=9606 GN=SFTPB PE=1 SV=3 | 0.001701367 | 0.000788171 | 0.003169496 | 0.452550382 | 2.158626031 | 1.110113327 | |
| XPO6 | Q96QU8 | Exportin-6 OS=Homo sapiens OX=9606 GN=XPO6 PE=1 SV=1 | 0.001767719 | 0.00070282 | 0.018337683 | 0.506740172 | 2.515178926 | 1.330661035 | |
| RNASE3 | P12724 | Eosinophil cationic protein OS=Homo sapiens OX=9606 GN=RNASE3 PE=1 SV=2 | 0.001635839 | 0.000535435 | 0.017899852 | 0.505007551 | 3.055158125 | 1.611247051 | |
| CILP | O75339 | Cartilage intermediate layer protein 1 OS=Homo sapiens OX=9606 GN=CILP PE=1 SV=4 | 0.001190555 | 0.000363419 | 0.028459737 |  | 3.275980453 | 1.711926749 | |
| ITGAM | P11215 | Integrin alpha-M OS=Homo sapiens OX=9606 GN=ITGAM PE=1 SV=2 | 0.001207714 | 0.000345428 | 0.040703513 | 0.550587566 | 3.496280962 | 1.805821125 | |
| CRELD1 | Q96HD1 | Protein disulfide isomerase CRELD1 OS=Homo sapiens OX=9606 GN=CRELD1 PE=1 SV=3 | 0.001229654 | 0.000343455 | 0.028459737 |  | 3.580246218 | 1.840058807 | |
| CEMIP | Q8WUJ3 | Cell migration-inducing and hyaluronan-binding protein OS=Homo sapiens OX=9606 GN=CEMIP PE=1 SV=2 | 0.001237259 | 0.000327625 | 0.046767365 | 0.555734238 | 3.776449713 | 1.917030576 | |
| GALNT5 | Q7Z7M9 | Polypeptide N-acetylgalactosaminyltransferase 5 OS=Homo sapiens OX=9606 GN=GALNT5 PE=1 SV=1 | 0.001326738 | 0.000228585 | 0.004017585 | 0.460276482 | 5.804138063 | 2.537081837 | |
| SCGB3A2 | Q96PL1 | Secretoglobin family 3A member 2 OS=Homo sapiens OX=9606 GN=SCGB3A2 PE=1 SV=1 | 0.001231057 | 2.80967E-05 | 0.004677735 |  | 43.81501352 | 5.453353399 | |

Supplemental table 1 Upregulated and downregulated proteins
